# Supplementary material
Source: PubMed Central journal article supplement (PMC6592635)
Supplement: NIHMS1522792-supplement-1.pdf [file NIHMS1522792-supplement-1.pdf]

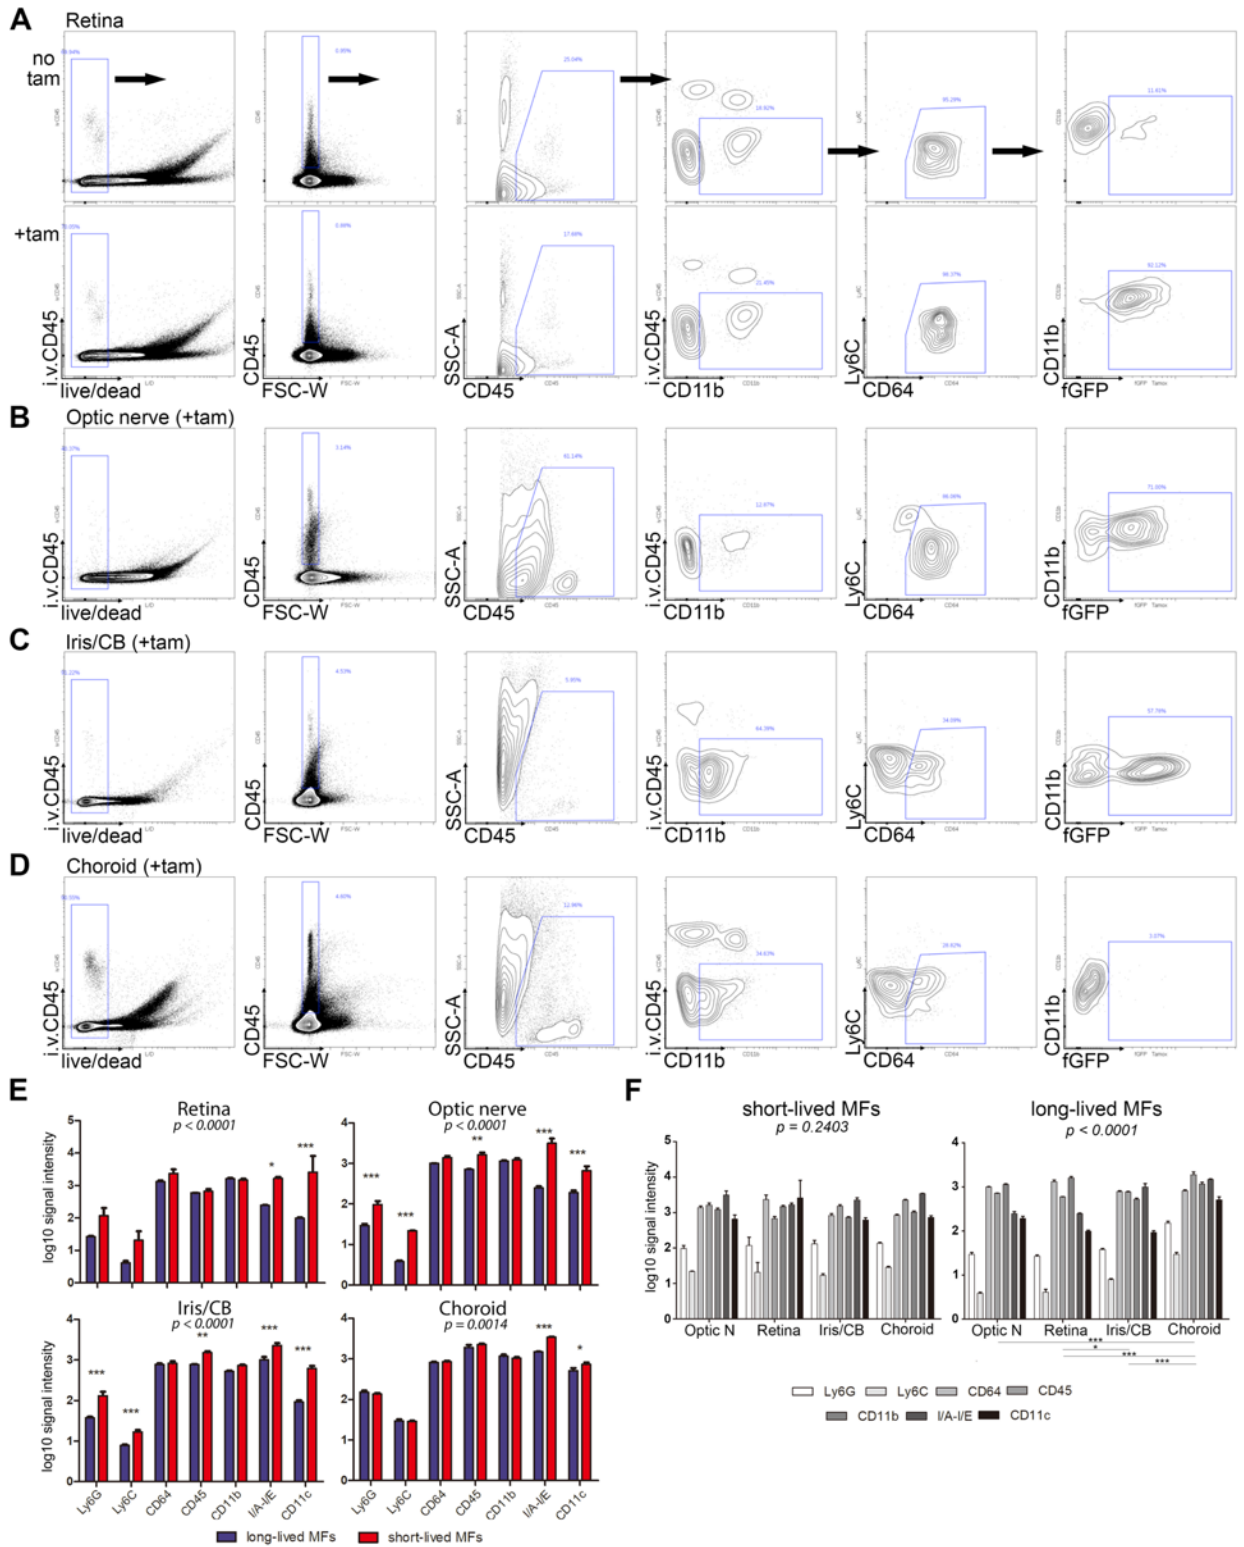

**Figure S1. Comparisons of macrophages across different anatomic structures of the eye, Related to Figure 1. (A-D)** Representative gating strategies of macrophages in retina (A), optic nerve (B), iris/ciliary body (C) and choroid (D). (B-D) Tissues only shown from tam-pulsed mice. Note, i.v. CD45 indicates i.v. injected CD45 antibody prior to euthanasia to label intravascular cells. **(E, F)** Bar graphs (mean  $\pm$  SEM) compare long-lived and short-lived macrophages in the retina, optic nerve, iris/ciliary body, and choroid (E) and the tissue-specificity of long-lived and short-lived macrophages among eye tissues (F). Statistics were calculated using Two-way ANOVA with Bonferroni's post-hoc test.

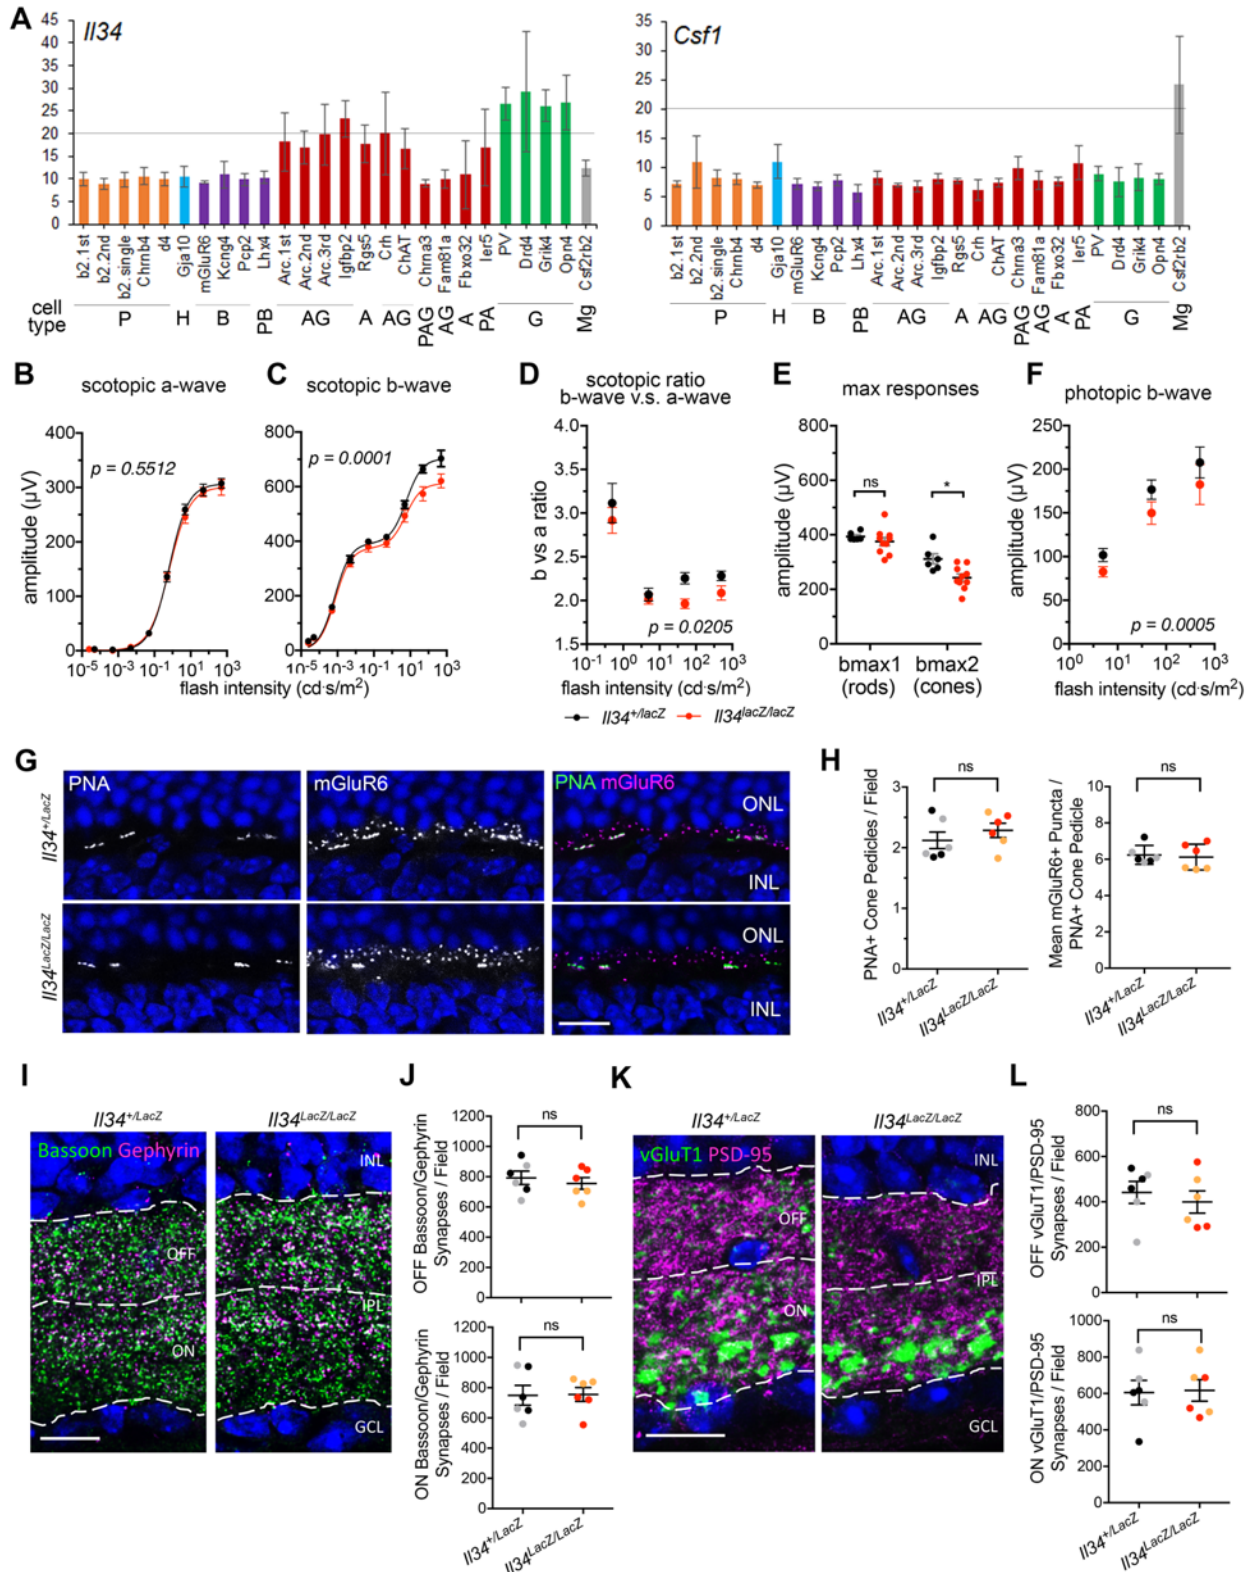

**Figure S2. IL-34 Dependent Contributions to Other Light Responses of Retina, Related Figure 2. (A)** The expression level of *Il34* and *Csf1* in different retinal cell types using the database (Siegert et al, 2011). P, photoreceptors; H, horizontal cells; B, bipolar cells; A, amacrine cells; G, cells in ganglion layer; Mg, microglia. **(B-F)** Comparisons of scotopic a-wave (B), scotopic b-wave (C), scotopic ratio of b-wave and a-wave (D), max responses of scotopic b-wave (E) and photopic b-wave (F) between *Il34*<sup>+/*LacZ*</sup> and *Il34*<sup>*LacZ/LacZ*</sup> mice. *Il34*<sup>+/*LacZ*</sup>, n = 6; *Il34*<sup>*LacZ/LacZ*</sup>, n = 10. **(G-L)** Synapse numbers are unchanged in *Il34* mutants. N = 2 animals of each genotype. Dots of the same color represent ROIs from the same animal. Data are expressed as mean ± SE. All scale bars, 10 μm. (G) Representative images of cone synapses in the OPL of *Il34* mutants. Peanut agglutinin (PNA) labels cone pedicles; anti-mGluR6 labels postsynaptic sites at tips of ON bipolar cell dendrites. Colocalization reveals cone synapses, and remaining mGluR6+ puncta are rod synapses. (H) Quantification of cone pedicles (left) and cone synapses onto ON bipolar cells (right) in *Il34* mutants and heterozygous controls. (I) Representative images of the IPL with inhibitory synapses marked by colocalization of anti-bassoon (presynaptic, green) and anti-gephyrin (postsynaptic, magenta) in *Il34* mutant retinas. OFF and ON regions of the IPL were analyzed separately (dashed lines). (J) Quantification of bassoon/gephyrin synaptic puncta in OFF (top) and ON (bottom) IPL sublaminae. (K) Representative images of the IPL with excitatory synapses marked by colocalization of anti-vGluT1 (presynaptic, green) and anti-PSD-95 (postsynaptic, magenta) in *Il34* heterozygous and homozygous adult mouse retinas. OFF and ON regions of the IPL were analyzed separately (dashed lines). (L) Quantification of vGluT1/PSD-95 synaptic puncta in the OFF (top) and ON (bottom) IPL sublaminae.

### Figure S3

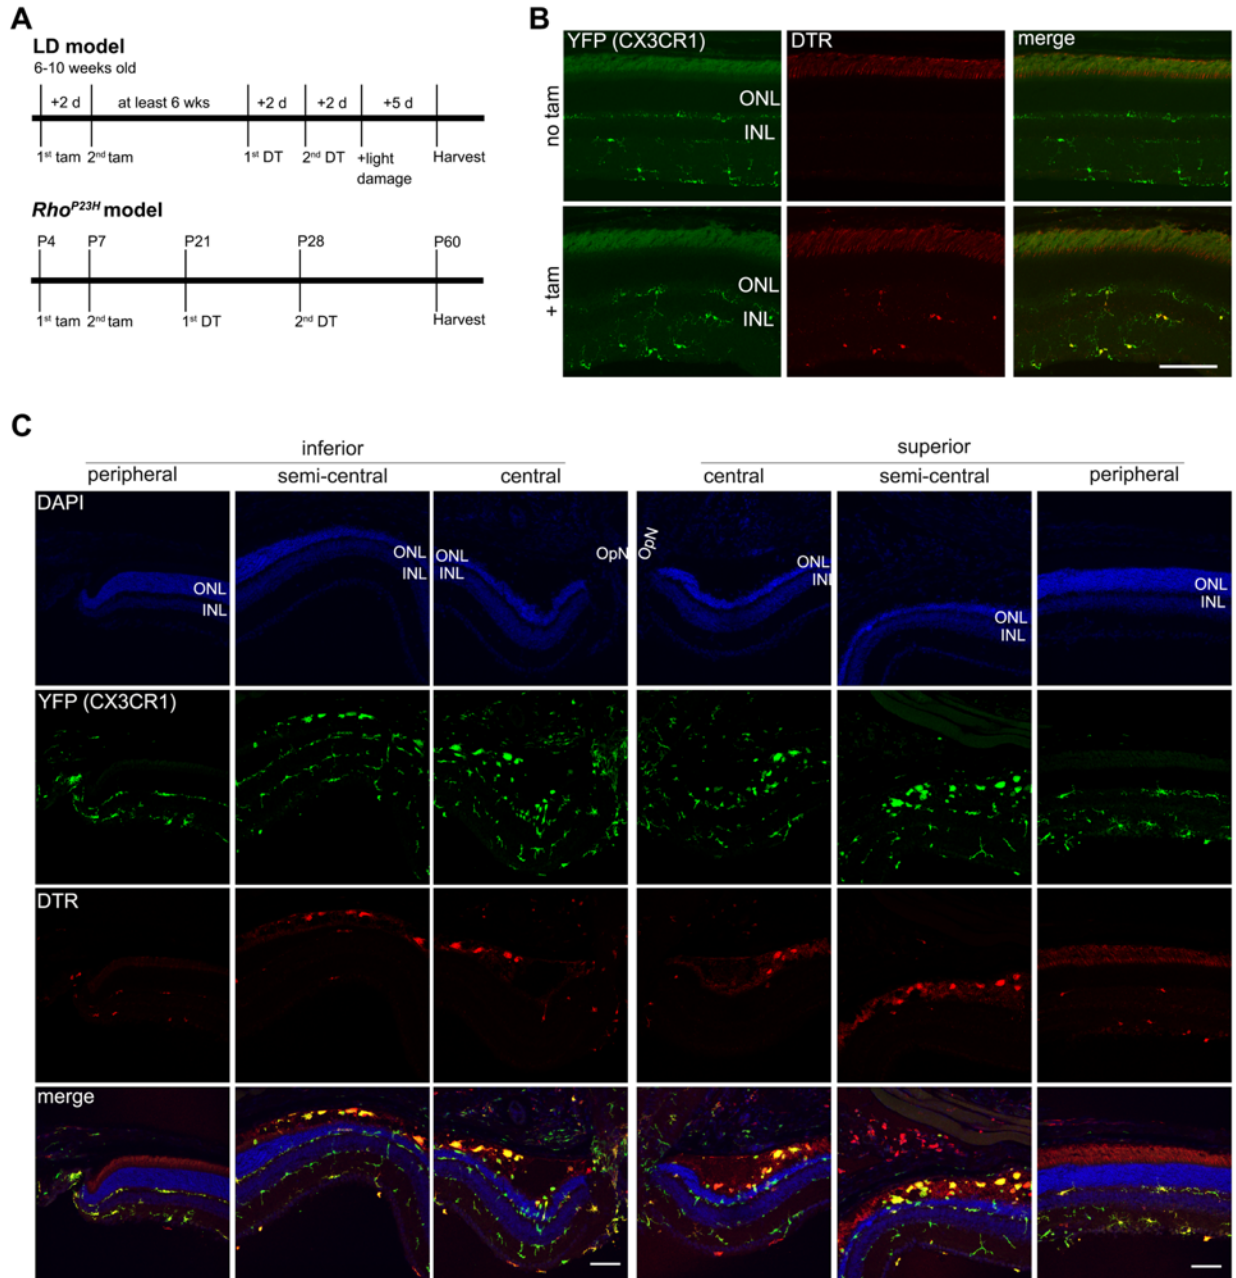

**Figure S3. Depletion of srMG in LD Model and *Rho*<sup>P23H</sup> model, Related to Figure 3. (A)** Schematic flow of microglia depletion in LD model (top) and *Rho*<sup>P23H</sup> mice (bottom). **(B)** Representative images show DTR+ microglia (Cx3cr1<sup>YFP</sup>, green; DTR, red) in lineage tracing of F1-iDTR mice. Mice not receiving tam were used as controls. Scale bars, 100  $\mu$ m. **(C)** Representative images of retinal cross sections from different regions of the same mouse show the asymmetric distribution of subretinal niche microglia (DAPI, blue; YFP, green; DTR, red)

between inferior and superior regions in F1-iDTR mice under the LD setting. Scale bars, 100  $\mu\text{m}$ .

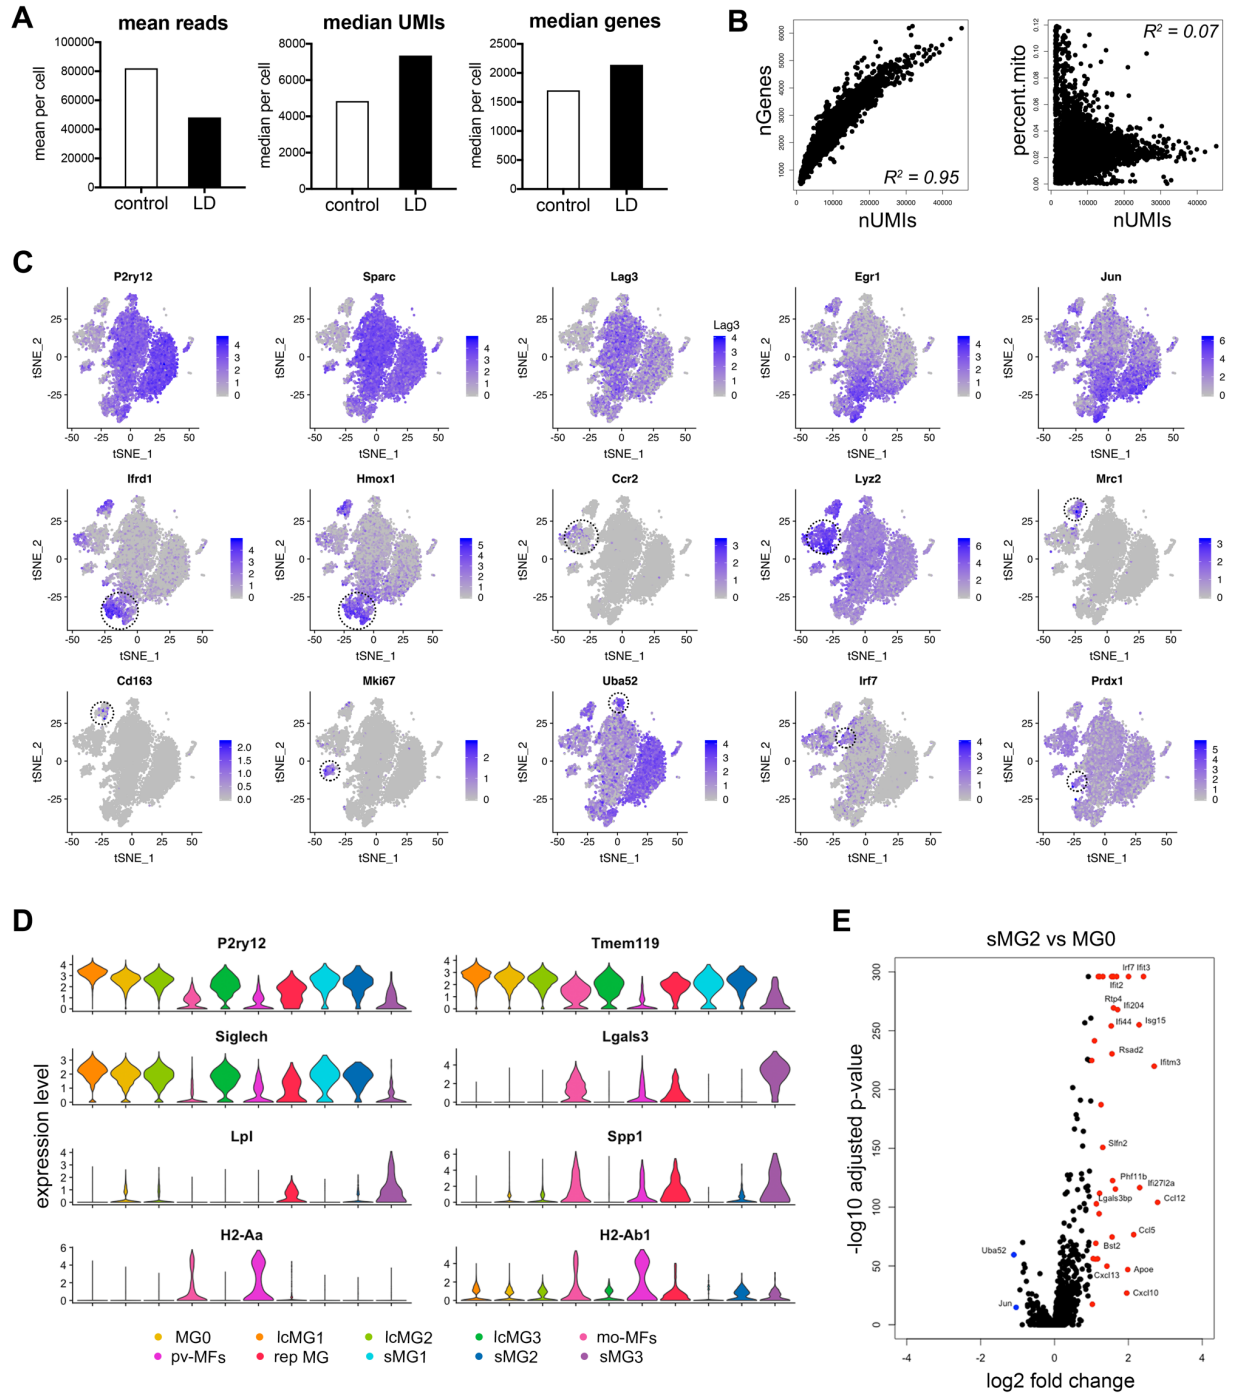

**Figure S4. Single Cell RNA-Seq Clusters in Retinal Degeneration, Related to Figure 4. (A)** Parameters of single cell RNA-seq from Cell Ranger were shown. **(B)** Correlations between the number of UMIs and the number of genes per cell or mitochondria gene percentage were evaluated using Seurat with Pearson's Correlation ( $R^2$ ). **(C)** Marker genes in Fig 4B were shown using FeaturePlot() of Seurat. **(D)** Violin plots depict expression changes of marker genes as

indicated across ten major clusters described in (Fig 4A) on the x axis. **(E)** Volcano plot shows the fold change of genes (x axis, log<sub>2</sub> scale) and significance (y axis, -log<sub>10</sub> scale) between sMG2 to homeostatic microglia (MG0).



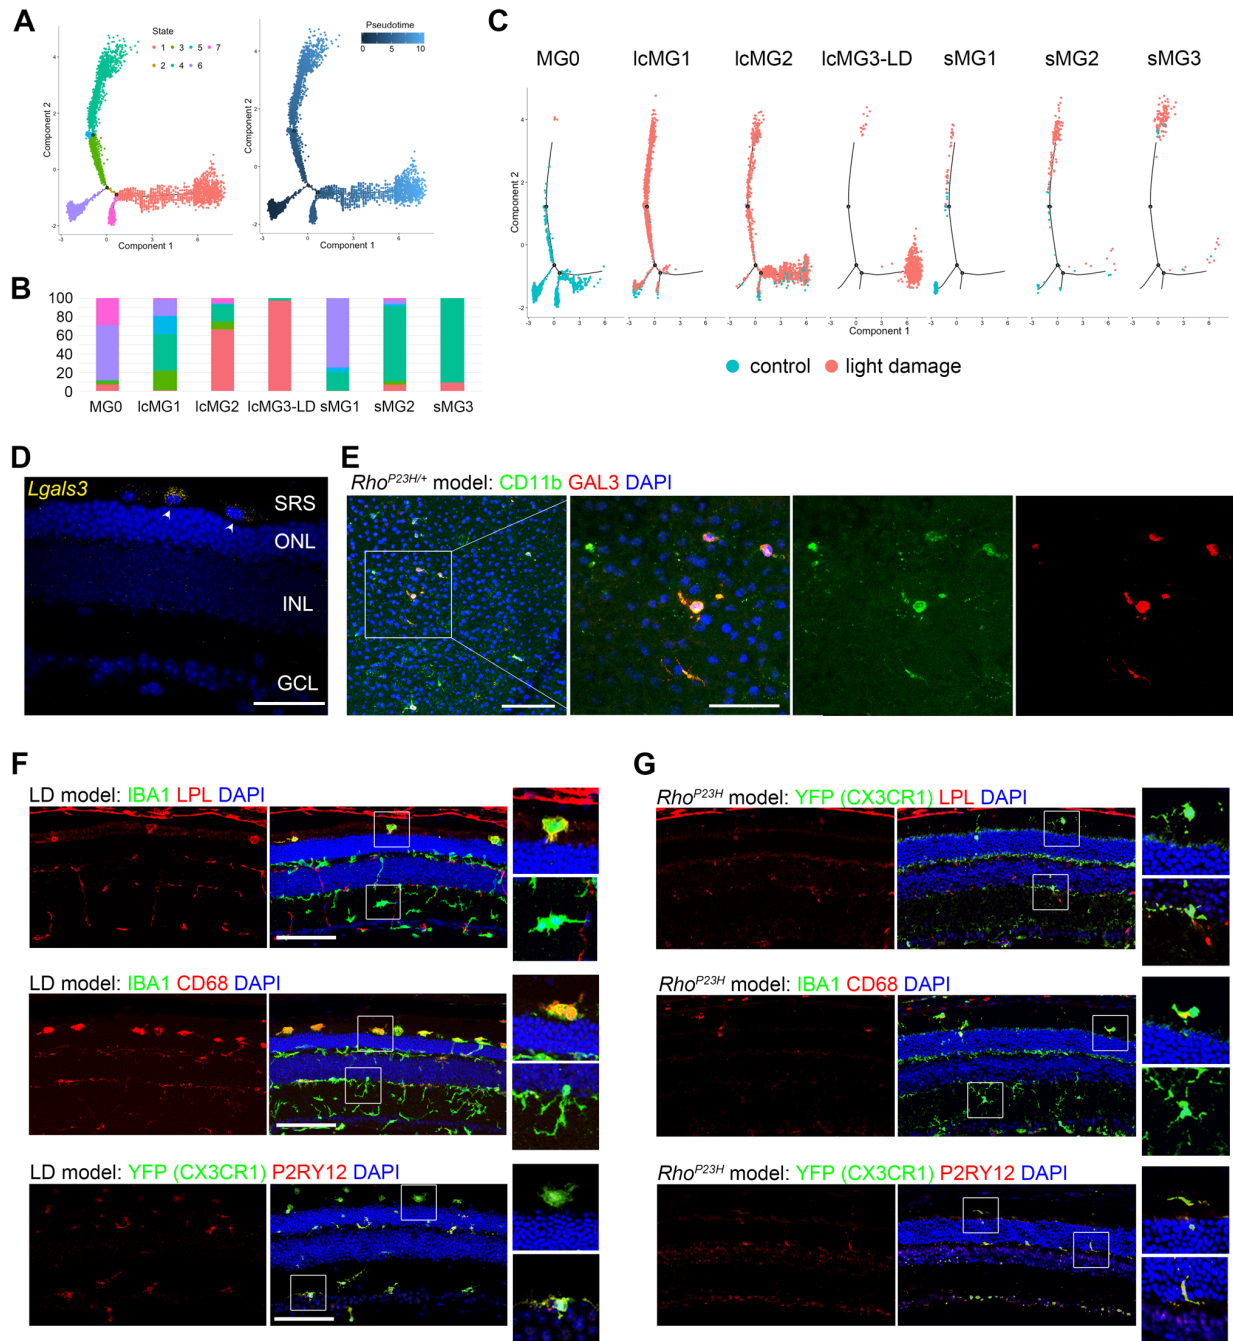

**Figure S5. Identification and Validation of srMG Markers, Related to Figure 5. (A)**

Trajectory plots suggest seven states of retinal microglia upon LD. MG0 was set as the initial state with pseudotime = 0. **(B)** The % of states in each cluster is shown. **(C)** Dot plots show cell distribution along the trajectory of each cluster from control and light damage as indicated. **(D)** RNAScope *in situ* hybridization of *Lgals3* in LD model. **(E)** Representative images show GAL3<sup>+</sup> (red) subretinal microglia in RPE flat mounts (D) of *Rho*<sup>P23</sup> mice (IBA1 or CD11b, green). Scale bar, 100  $\mu$ m. **(F,G)** Immunostaining of LPL, CD68, P2RY12 (all in red) and IBA1 or YFP (green)

in the retinal cross sections shows the localization of sMG3 in the SRS of LD model (F) and two-month old *Rho*<sup>P23H</sup> mice (G). Images (D-G) were acquired from 3 to 6 mice in three independent experiments. See Table S2 for details. Scale bars, 100 μm.

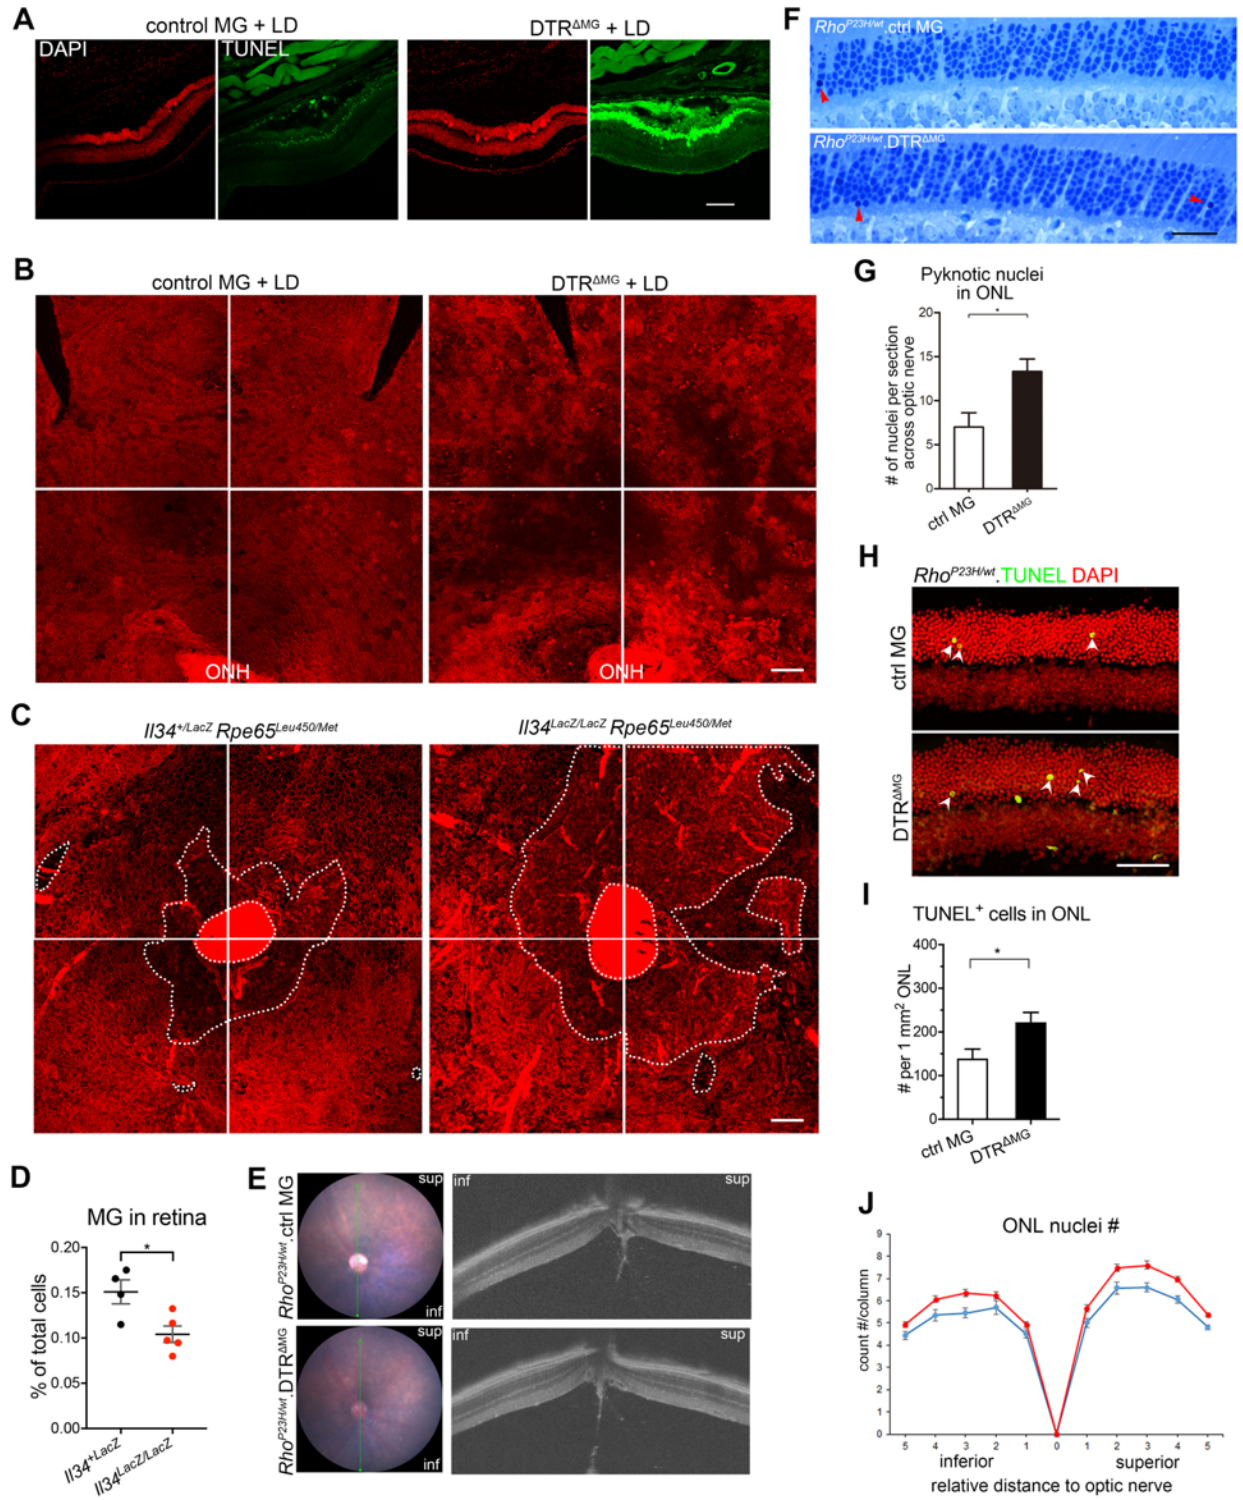

**Figure S6. Characterization of Photoreceptor Degeneration in Microglia Depletion**

**Settings, Related to Figure 6. (A)** Representative images of retinal cross sections show abundant TUNEL<sup>+</sup> staining (green) in DTR<sup>ΔMG</sup> retina upon LD. DAPI, red. Scale bar, 100 μm. **(B, C)** Representative images from stitched fields of the RPE in CBF1 (B) and *Il34<sup>LacZ</sup>*

*Rpe65*<sup>Leu450/met450</sup> mice (C) under LD settings. Scale bars, 100  $\mu$ m. (D) Dot plots (mean  $\pm$  SEM) depict the % of microglia compared to total viable singlets in retina using flow cytometry between *I134*<sup>+/LacZ</sup> and *I134*<sup>LacZ/LacZ</sup> mice. Each dot represents one mouse. (E) Fundus imaging (left) and OCT (right) show no obvious morphological alteration in *Rho23*<sup>P23H</sup> mice. (F) Representative images compare pyknotic nuclei in ONL as indicated by red arrow heads between *Rho23*<sup>P23H</sup>.control MG and DTR <sup>$\Delta$ MG</sup> mice. Scale bar, 100  $\mu$ m. (G) Bar graphs (mean  $\pm$  SEM) summarize the number of pyknotic nuclei in ONL shown in (F). *Rho23*<sup>P23H</sup>.control MG mice, n = 4; *Rho23*<sup>P23H</sup>.DTR <sup>$\Delta$ MG</sup> mice, n = 10. (H) TUNEL staining (green) in the retinas of *Rho23*<sup>P23H</sup> mice with/without microglia depletion. DAPI, red. Scale bar, 100  $\mu$ m. (I) Bar graphs (mean  $\pm$  SEM) summarize the number of TUNEL<sup>+</sup> cells in ONL shown in (H). N = 5 mice per group. (J) Quantification of the outer nuclear layer shows the increased cell number in the *Rho23*<sup>P23H</sup>.DTR <sup>$\Delta$ MG</sup> mice. *Rho23*<sup>P23H</sup>.control MG mice, n = 10; *Rho23*<sup>P23H</sup>.DTR <sup>$\Delta$ MG</sup> mice, n = 15.

**Table S1. List of Marker Genes in the Cluster Heatmap, Related to Figure 4**

| <b>Genes</b> | <b>Cluster ID</b> | <b>Genes</b>  | <b>Cluster ID</b> |
|--------------|-------------------|---------------|-------------------|
| Uba52        | MG0_1             | H2-Eb1        | mo-MFs_5          |
| Ier5         | MG0_1             | Gpnmb         | mo-MFs_5          |
| P2ry12       | MG0_1             | Fabp5         | mo-MFs_5          |
| Gm10073      | MG0_1             | Cxcl2         | pv-MFs_6          |
| Gpr34        | MG0_1             | Cxcl1         | pv-MFs_6          |
| P2ry13       | MG0_1             | Il1b          | pv-MFs_6          |
| Rhob         | MG0_1             | Ccl7          | pv-MFs_6          |
| Gm26825      | MG0_1             | Phlda1        | pv-MFs_6          |
| Jun          | MG0_1             | Ccl2          | pv-MFs_6          |
| Gm26522      | MG0_1             | Stmn1         | repMG_7           |
| Sparc        | lcMG1_2           | Hmgb2         | rep MG_7          |
| Man2b1       | lcMG1_2           | 2810417H13Rik | rep MG_7          |
| Lag3         | lcMG1_2           | Top2a         | rep MG_7          |
| Cox7a2l      | lcMG1_2           | Birc5         | rep MG_7          |
| Lgals3bp     | lcMG1_2           | Tuba1b        | rep MG_7          |
| Ifi2712a     | lcMG1_2           | H2afz         | rep MG_7          |
| Zfos1        | lcMG1_2           | Tubb5         | rep MG_7          |
| Eef1b2       | lcMG1_2           | Smc4          | rep MG_7          |
| Itgam        | lcMG1_2           | Ube2c         | rep MG_7          |
| Ppfia4       | lcMG1_2           | Rpl23a-ps3    | sMG1_8            |
| Egr1         | lcMG2_3           | Gm10076       | sMG1_8            |
| Nfkbia       | lcMG2_3           | Rps18-ps3     | sMG1_8            |
| Fos          | lcMG2_3           | Rpl9-ps6      | sMG1_8            |
| Junb         | lcMG2_3           | Rpl6l         | sMG1_8            |
| Ier2         | lcMG2_3           | Grcc10        | sMG1_8            |
| Btg2         | lcMG2_3           | RP23-81F19.2  | sMG1_8            |
| Ccl2         | lcMG2_3           | Syngn1        | sMG1_8            |
| Zfp36        | lcMG2_3           | Ifit3         | sMG2_9            |
| Hspa1b       | lcMG2_3           | Phf11b        | sMG2_9            |
| Ifrd1        | lcMG3_4           | Ifit2         | sMG2_9            |
| Hmox1        | lcMG3_4           | Ifit3b        | sMG2_9            |
| Il1a         | lcMG3_4           | Usp18         | sMG2_9            |
| Tnf          | lcMG3_4           | Isg15         | sMG2_9            |
| Cd83         | lcMG3_4           | Ifit1         | sMG2_9            |
| Atf3         | lcMG3_4           | Ccl12         | sMG2_9            |
| Kdm6b        | lcMG3_4           | Irf7          | sMG2_9            |
| Icam1        | lcMG3_4           | Cxcl10        | sMG2_9            |
| Ccl4         | lcMG3_4           | Lgals3        | sMG3_10           |
| Ccl3         | lcMG3_4           | Prdx1         | sMG3_10           |
| Lyz2         | mo-MFs_5          | Plin2         | sMG3_10           |
| Ms4a7        | mo-MFs_5          | Vim           | sMG3_10           |
| Ms4a6c       | mo-MFs_5          | Lilrb4a       | sMG3_10           |
| H2-Ab1       | mo-MFs_5          | Lilr4b        | sMG3_10           |
| Cd74         | mo-MFs_5          | Sqstm         | sMG3_10           |
| Spp1         | mo-MFs_5          | Mmp12         | sMG3_10           |
| H2-Aa        | mo-MFs_5          |               |                   |

**Table S2. Summary Data of Immunostaining/RNAScope Validation of sMG3 Markers**

| <b>Marker (Method)</b>                       | <b>Model</b>               | <b># of mice</b> | <b>sex</b> | <b># of mice with positive markers</b> |
|----------------------------------------------|----------------------------|------------------|------------|----------------------------------------|
| Gals3(antibody)/<br><i>Lgals3</i> (RNAScope) | LD                         | 6                | ♂, 4; ♀, 2 | All                                    |
| Cd68 (antibody)                              | LD                         | 4                | ♂, 2; ♀, 2 | All                                    |
| Lpl (antibody)                               | LD                         | 4                | ♂, 2; ♀, 2 | All                                    |
| Gals3(antibody)                              | <i>Rho</i> <sup>P23H</sup> | 4                | ♂, 3; ♀, 1 | All                                    |
| Cd68 (antibody)                              | <i>Rho</i> <sup>P23H</sup> | 3                | ♂, 2; ♀, 1 | All                                    |
| Lpl (antibody)                               | <i>Rho</i> <sup>P23H</sup> | 3                | ♂, 2; ♀, 1 | None                                   |
